# Supplementary material
Source: publisher figshare collection journal article supplement (https://asha.figshare.com/articles/dataset/_/22573030)
Supplement: Supplementary file 1 [file 1]

**Supplemental Material S3.** Associations between speech variables and demographic factors (Model 2) and self-harm with and without suicidal intent ( $N = 3,824$ ).

|                                                         | Omnibus test for variable | Self-harm without suicidal intent versus no self-harm |              |                 | Self-harm with suicidal intent versus no self-harm |              |                 | Self-harm with suicidal intent versus self-harm without suicidal intent |              |                 |
|---------------------------------------------------------|---------------------------|-------------------------------------------------------|--------------|-----------------|----------------------------------------------------|--------------|-----------------|-------------------------------------------------------------------------|--------------|-----------------|
|                                                         | <i>p</i> -value           | <i>OR</i>                                             | 95% CI       | <i>p</i> -value | <i>OR</i>                                          | 95% CI       | <i>p</i> -value | <i>OR</i>                                                               | 95% CI       | <i>p</i> -value |
| Stutter                                                 | .409                      | 1.24                                                  | [0.64, 2.39] | .520            | 0.44                                               | [0.11, 1.83] | .260            | 0.36                                                                    | [0.08, 1.64] | .185            |
| SSD                                                     | .010                      | 1.26                                                  | [0.71, 2.22] | .426            | 2.44                                               | [1.37, 4.34] | .002            | 1.94                                                                    | [0.92, 4.06] | .080            |
| Female gender                                           | < .001                    | 3.38                                                  | [2.67, 4.28] | < .001          | 3.33                                               | [2.43, 4.58] | < .001          | 0.99                                                                    | [0.67, 1.44] | .943            |
| Equivalized income (per quintile, 0 [high] - 1 [low])   | .002                      | 1.04                                                  | [0.96, 1.14] | .339            | 1.22                                               | [1.09, 1.36] | < .001          | 1.17                                                                    | [1.02, 1.33] | .020            |
| Parent social class (other vs. professional/managerial) | .905                      | 0.94                                                  | [0.74, 1.21] | .655            | 0.99                                               | [0.72, 1.36] | .961            | 1.05                                                                    | [0.72, 1.53] | .799            |
| Mother's education (degree = reference)                 | .027                      |                                                       |              |                 |                                                    |              |                 |                                                                         |              |                 |
| A-level                                                 |                           | 0.70                                                  | [0.53, 0.93] | .013            | 1.21                                               | [0.80, 1.82] | .377            | 1.73                                                                    | [1.07, 2.78] | .024            |
| O-level                                                 |                           | 0.94                                                  | [0.71, 1.26] | .690            | 1.23                                               | [0.80, 1.90] | .336            | 1.31                                                                    | [0.80, 2.13] | .279            |
| < O-level                                               |                           | 0.62                                                  | [0.42, 0.90] | .013            | 1.09                                               | [0.66, 1.80] | .740            | 1.76                                                                    | [0.97, 3.17] | .062            |

Note. "O-level" was the qualification obtained at the age of 16 years when the parents of the cohort were at school. *OR* = odds ratio; *CI* = confidence interval; SSD = speech sound disorder.
