# Supplementary material
Source: publisher figshare collection journal article supplement (https://asha.figshare.com/articles/dataset/_/22573030)
Supplement: Supplementary file 2 [file 1]

**Supplemental Material S1.** Degree of "missingness" in variables.

| <b>Covariate</b>                          | <b>Missing</b> | <b>%</b> |
|-------------------------------------------|----------------|----------|
| Gender                                    | 0              | 0.0      |
| Income                                    | 279            | 7.3      |
| Parent social class                       | 191            | 5.0      |
| Mother's education                        | 66             | 1.7      |
| IQ                                        | 44             | 1.2      |
| Body dissatisfaction                      | 550            | 14.4     |
| Arnett intensity subscale                 | 104            | 2.7      |
| Arnett novelty subscale                   | 117            | 3.1      |
| SMFQ depressive symptoms                  | 553            | 14.5     |
| DAWBA depression                          | 687            | 18.0     |
| DAWBA anxiety                             | 686            | 17.9     |
| Alcohol                                   | 819            | 21.4     |
| Cannabis                                  | 733            | 19.2     |
| Smoking                                   | 714            | 18.7     |
| Childhood sexual abuse                    | 227            | 5.9      |
| Parental cruelty to children in household | 1,028          | 26.9     |
| Being bullied                             | 408            | 10.7     |
| Parent suicide attempt                    | 282            | 7.4      |
| Mother self-harm                          | 21             | 0.5      |
| Father self-harm                          | 21             | 0.5      |
| Friend self-harm                          | 21             | 0.5      |

*Note.* SMFQ = short mood and feelings questionnaire; DAWBA = development and well-being assessment.
