# Supplementary material
Source: publisher figshare collection journal article supplement (https://asha.figshare.com/articles/dataset/_/22573030)
Supplement: Supplementary file 3 [file 1]

**Supplemental Material S5.** Associations between speech variables and environmental factors (Model 4) and self-harm with and without suicidal intent ( $N = 3,824$ ).

|                                     | Omnibus test<br>for variable | Self-harm without suicidal intent<br>versus no self-harm |              |                 | Self-harm with suicidal intent<br>versus no self-harm |              |                 | Self-harm with suicidal intent<br>versus self-harm without<br>suicidal intent |              |                 |
|-------------------------------------|------------------------------|----------------------------------------------------------|--------------|-----------------|-------------------------------------------------------|--------------|-----------------|-------------------------------------------------------------------------------|--------------|-----------------|
|                                     | <i>p</i> -value              | <i>OR</i>                                                | 95% CI       | <i>p</i> -value | <i>OR</i>                                             | 95% CI       | <i>p</i> -value | <i>OR</i>                                                                     | 95% CI       | <i>p</i> -value |
| Stutter                             | .277                         | 0.92                                                     | [0.47, 1.81] | .812            | 0.30                                                  | [0.07, 1.31] | .109            | 0.33                                                                          | [0.07, 1.53] | .157            |
| SSD                                 | .080                         | 1.11                                                     | [0.62, 2.00] | .723            | 2.04                                                  | [1.09, 3.80] | .025            | 1.83                                                                          | [0.87, 3.88] | .113            |
| Childhood sexual abuse              | .230                         | 2.90                                                     | [0.88, 9.52] | .079            | 1.76                                                  | [0.33, 9.51] | .512            | 0.61                                                                          | [0.11, 3.27] | .560            |
| Cruelty to children in<br>household | .001                         | 1.39                                                     | [0.82, 2.36] | .223            | 2.85                                                  | [1.65, 4.90] | < .001          | 2.05                                                                          | [1.07, 3.92] | .031            |
| Being bullied                       | .001                         | 1.15                                                     | [0.90, 1.46] | .254            | 1.77                                                  | [1.31, 2.40] | < .001          | 1.54                                                                          | [1.08, 2.18] | .016            |
| Parent suicide attempt              | .123                         | 0.56                                                     | [0.19, 1.67] | .299            | 1.88                                                  | [0.80, 4.41] | .147            | 3.34                                                                          | [1.01, 11.1] | .048            |
| Mother self-harm (child-<br>rated)  | < .001                       | 3.41                                                     | [1.45, 8.02] | .005            | 7.97                                                  | [3.58, 17.7] | < .001          | 2.34                                                                          | [1.00, 5.48] | .050            |
| Father self-harm (child-<br>rated)  | .164                         | 1.07                                                     | [0.28, 4.15] | .919            | 3.04                                                  | [0.92, 10.1] | .069            | 2.83                                                                          | [0.64, 12.5] | .170            |
| Friend self-harm (child-<br>rated)  | < .001                       | 6.88                                                     | [5.49, 8.62] | < .001          | 9.34                                                  | [6.68, 13.1] | < .001          | 1.36                                                                          | [0.92, 2.00] | .122            |

*Note.* *OR* = odds ratio; CI = confidence interval; SSD = speech sound disorder.
