# Supplementary material
Source: publisher figshare collection journal article supplement (https://asha.figshare.com/articles/dataset/_/22573030)
Supplement: Supplementary file 4 [file 1]

**Supplemental Material S4.** Associations between speech variables and personal factors (Model 3) and self-harm with and without suicidal intent ( $N = 3,824$ ).

|                                                  | Omnibus test<br>for variable | Self-harm without suicidal intent<br>versus no self-harm |              |                 | Self-harm with suicidal intent<br>versus no self-harm |              |                 | Self-harm with suicidal intent<br>versus self-harm without<br>suicidal intent |              |                 |
|--------------------------------------------------|------------------------------|----------------------------------------------------------|--------------|-----------------|-------------------------------------------------------|--------------|-----------------|-------------------------------------------------------------------------------|--------------|-----------------|
|                                                  | <i>p</i> -value              | <i>OR</i>                                                | 95% CI       | <i>p</i> -value | <i>OR</i>                                             | 95% CI       | <i>p</i> -value | <i>OR</i>                                                                     | 95% CI       | <i>p</i> -value |
| Stutter                                          | .328                         | 0.86                                                     | [0.44, 1.68] | .654            | 0.34                                                  | [0.08, 1.45] | .145            | 0.40                                                                          | [0.09, 1.84] | .239            |
| SSD                                              | .068                         | 1.10                                                     | [0.62, 1.96] | .739            | 2.06                                                  | [1.11, 3.83] | .022            | 1.87                                                                          | [0.88, 4.00] | .105            |
| Total IQ (10-point<br>increments)                | .026                         | 1.08                                                     | [1.02, 1.16] | .016            | 0.96                                                  | [0.88, 1.05] | .377            | 0.89                                                                          | [0.80, 0.98] | .022            |
| Body dissatisfaction                             | < .001                       | 2.02                                                     | [1.61, 2.52] | < .001          | 2.66                                                  | [1.94, 3.65] | < .001          | 1.32                                                                          | [0.92, 1.89] | .132            |
| Sensation seeking (Arnett<br>intensity subscale) | .005                         | 1.01                                                     | [0.89, 1.14] | .927            | 1.34                                                  | [1.12, 1.60] | .001            | 1.33                                                                          | [1.09, 1.63] | .006            |
| Sensation seeking (Arnett<br>novelty subscale)   | .080                         | 1.17                                                     | [1.02, 1.34] | .024            | 1.04                                                  | [0.86, 1.26] | .696            | 0.89                                                                          | [0.71, 1.10] | .284            |
| Depressive symptoms<br>(SMFQ 11+)                | < .001                       | 2.26                                                     | [1.67, 3.04] | < .001          | 3.65                                                  | [2.56, 5.21] | < .001          | 1.62                                                                          | [1.08, 2.43] | .021            |
| DAWBA depression                                 | .003                         | 1.60                                                     | [0.65, 3.98] | .307            | 4.25                                                  | [1.86, 9.69] | .001            | 2.65                                                                          | [1.00, 7.01] | .050            |
| DAWBA anxiety                                    | .005                         | 1.71                                                     | [0.78, 3.76] | .179            | 3.58                                                  | [1.62, 7.90] | .002            | 2.09                                                                          | [0.84, 5.18] | .112            |
| Alcohol (heavy drinking)                         | .008                         | 1.52                                                     | [1.17, 1.98] | .002            | 1.24                                                  | [0.85, 1.80] | .266            | 0.81                                                                          | [0.53, 1.24] | .337            |
| Cannabis (occasional)                            | < .001                       | 2.18                                                     | [1.51, 3.15] | < .001          | 1.00                                                  | [0.58, 1.71] | .987            | 0.46                                                                          | [0.25, 0.83] | .011            |
| Smoking (weekly)                                 | < .001                       | 1.12                                                     | [0.75, 1.69] | .572            | 2.99                                                  | [1.92, 4.66] | < .001          | 2.66                                                                          | [1.54, 4.58] | < .001          |

*Note.* *OR* = odds ratio; CI = confidence interval; SSD = speech sound disorder; SMFQ = short mood and feelings questionnaire; DAWBA = development and well-being assessment.
