# Supplementary material
Source: publisher figshare collection journal article supplement (https://asha.figshare.com/articles/dataset/_/22573030)
Supplement: Supplementary file 5 [file 1]

**Supplemental Material S6.** Associations between speech variables and all factors (final model) and self-harm with and without suicidal intent ( $N = 3,824$ ).

|                                                            | Omnibus test<br>for variable | Self-harm without suicidal intent versus<br>no self-harm |              |                 | Self-harm with suicidal intent versus<br>no self-harm |              |                 | Self-harm with suicidal intent versus<br>self-harm without<br>suicidal intent |              |                 |
|------------------------------------------------------------|------------------------------|----------------------------------------------------------|--------------|-----------------|-------------------------------------------------------|--------------|-----------------|-------------------------------------------------------------------------------|--------------|-----------------|
|                                                            | <i>p</i> -value              | <i>OR</i>                                                | 95% CI       | <i>p</i> -value | <i>OR</i>                                             | 95% CI       | <i>p</i> -value | <i>OR</i>                                                                     | 95% CI       | <i>p</i> -value |
| Stutter                                                    | .500                         | 1.10                                                     | [0.54, 2.27] | .787            | 0.42                                                  | [0.09, 2.00] | .277            | 0.38                                                                          | [0.08, 1.91] | .241            |
| SSD                                                        | .020                         | 1.43                                                     | [0.78, 2.64] | .248            | 2.57                                                  | [1.31, 5.03] | .006            | 1.79                                                                          | [0.82, 3.91] | .145            |
| Female gender                                              | < .001                       | 2.45                                                     | [1.85, 3.23] | < .001          | 2.04                                                  | [1.38, 3.03] | < .001          | 0.83                                                                          | [0.53, 1.30] | .425            |
| Equivalized income (per<br>quintile, 0 [high] - 1 [low])   | .086                         | 1.03                                                     | [0.94, 1.13] | .490            | 1.15                                                  | [1.02, 1.31] | .028            | 1.12                                                                          | [0.97, 1.28] | .128            |
| Parent social class (other vs.<br>professional/managerial) | .927                         | 0.96                                                     | [0.73, 1.26] | .754            | 0.95                                                  | [0.66, 1.36] | .772            | 0.99                                                                          | [0.66, 1.48] | .961            |
| Mother's education<br>(degree = reference)                 | .057                         |                                                          |              |                 |                                                       |              |                 |                                                                               |              |                 |
| A-level                                                    |                              | 0.75                                                     | [0.55, 1.02] | .064            | 1.20                                                  | [0.76, 1.91] | .430            | 1.61                                                                          | [0.98, 2.66] | .062            |
| O-level                                                    |                              | 1.12                                                     | [0.81, 1.54] | .489            | 1.18                                                  | [0.72, 1.92] | .514            | 1.05                                                                          | [0.62, 1.78] | .855            |
| < O-level                                                  |                              | 0.75                                                     | [0.49, 1.14] | .180            | 1.00                                                  | [0.56, 1.80] | .990            | 1.34                                                                          | [0.70, 2.56] | .376            |
| Total IQ (10-point increments)                             | .155                         | 1.07                                                     | [0.99, 1.16] | .073            | 0.98                                                  | [0.88, 1.09] | .713            | 0.92                                                                          | [0.82, 1.03] | .131            |
| Body dissatisfaction                                       | < .001                       | 1.69                                                     | [1.33, 2.14] | < .001          | 2.20                                                  | [1.57, 3.08] | < .001          | 1.30                                                                          | [0.90, 1.89] | .164            |
| Sensation seeking (Arnett<br>intensity subscale)           | < .001                       | 1.24                                                     | [1.07, 1.43] | .004            | 1.63                                                  | [1.33, 1.99] | < .001          | 1.32                                                                          | [1.05, 1.64] | .015            |
| Sensation seeking (Arnett<br>novelty subscale)             | .324                         | 1.08                                                     | [0.93, 1.25] | .293            | 0.92                                                  | [0.75, 1.13] | .407            | 0.85                                                                          | [0.68, 1.06] | .150            |
| Depressive symptoms (SMFQ<br>11+)                          | < .001                       | 1.84                                                     | [1.33, 2.54] | < .001          | 2.83                                                  | [1.93, 4.15] | < .001          | 1.54                                                                          | [1.01, 2.33] | .042            |
| DAWBA depression                                           | .012                         | 1.36                                                     | [0.52, 3.59] | .529            | 3.76                                                  | [1.55, 9.14] | .003            | 2.76                                                                          | [1.02, 7.49] | .046            |
| DAWBA anxiety                                              | .027                         | 1.65                                                     | [0.71, 3.83] | .245            | 3.13                                                  | [1.35, 7.27] | .008            | 1.90                                                                          | [0.75, 4.81] | .176            |
| Alcohol (heavy drinking)                                   | .020                         | 1.50                                                     | [1.12, 2.00] | .006            | 1.29                                                  | [0.86, 1.93] | .210            | 0.86                                                                          | [0.56, 1.34] | .510            |
| Cannabis (occasional)                                      | .001                         | 2.07                                                     | [1.38, 3.09] | < .001          | 0.89                                                  | [0.50, 1.58] | .680            | 0.43                                                                          | [0.23, 0.80] | .007            |
| Smoking (weekly)                                           | .001                         | 0.94                                                     | [0.61, 1.46] | .796            | 2.45                                                  | [1.51, 3.99] | < .001          | 2.60                                                                          | [1.48, 4.55] | .001            |
| Childhood sexual abuse                                     | .092                         | 3.66                                                     | [1.04, 12.9] | .043            | 0.83                                                  | [0.10, 6.62] | .858            | 0.23                                                                          | [0.03, 1.69] | .147            |
| Cruelty to children in<br>household                        | .015                         | 1.32                                                     | [0.76, 2.31] | .327            | 2.45                                                  | [1.33, 4.51] | .004            | 1.85                                                                          | [0.93, 3.69] | .080            |
| Being bullied                                              | .217                         | 1.07                                                     | [0.83, 1.38] | .621            | 1.34                                                  | [0.96, 1.87] | .082            | 1.26                                                                          | [0.87, 1.83] | .221            |
| Parent suicide attempt                                     | .268                         | 0.53                                                     | [0.17, 1.61] | .261            | 1.49                                                  | [0.58, 3.82] | .410            | 2.81                                                                          | [0.81, 9.73] | .103            |
| Mother self-harm (child-rated)                             | .001                         | 2.50                                                     | [1.00, 6.25] | .051            | 5.55                                                  | [2.31, 13.3] | < .001          | 2.22                                                                          | [0.90, 5.49] | .083            |
| Father self-harm (child-rated)                             | .633                         | 0.85                                                     | [0.21, 3.45] | .823            | 1.69                                                  | [0.46, 6.26] | .428            | 1.99                                                                          | [0.42, 9.40] | .386            |
| Friend self-harm (child-rated)                             | < .001                       | 5.10                                                     | [4.02, 6.47] | < .001          | 7.50                                                  | [5.22, 10.8] | < .001          | 1.47                                                                          | [0.97, 2.22] | .066            |

Note. *OR* = odds ratio; *CI* = confidence interval; SSD = speech sound disorder; SMFQ = short mood and feelings questionnaire; DAWBA = development and well-being assessment.
