# Supplementary material
Source: publisher figshare collection journal article supplement (https://asha.figshare.com/articles/dataset/_/22573030)
Supplement: Supplementary file 6 [file 1]

**Supplemental Material S2.** Associations between speech variables (Model 1) and self-harm with and without suicidal intent (*N* = 3,824).

|         | Omnibus test<br>for variable | Self-harm without suicidal intent<br>versus no self-harm |              |                 | Self-harm with suicidal intent versus<br>no self-harm |              |                 | Self-harm with suicidal intent<br>versus self-harm without<br>suicidal intent |              |                 |
|---------|------------------------------|----------------------------------------------------------|--------------|-----------------|-------------------------------------------------------|--------------|-----------------|-------------------------------------------------------------------------------|--------------|-----------------|
|         | <i>p</i> -value              | <i>OR</i>                                                | 95% CI       | <i>p</i> -value | <i>OR</i>                                             | 95% CI       | <i>p</i> -value | <i>OR</i>                                                                     | 95% CI       | <i>p</i> -value |
| Stutter | .228                         | 0.89                                                     | [0.47, 1.69] | .731            | 0.29                                                  | [0.07, 1.20] | .089            | 0.33                                                                          | [0.07, 1.50] | .150            |
| SSD     | .044                         | 1.03                                                     | [0.59, 1.78] | .929            | 2.04                                                  | [1.16, 3.57] | .013            | 1.99                                                                          | [0.95, 4.14] | .067            |

Note. *OR* = odds ratio; CI = confidence interval; SSD = speech sound disorder.
